# Supplementary material
Source: publisher figshare collection journal article supplement (https://gsajournals.figshare.com/ndownloader/files/26770214)
Supplement: Supplementary file 1 [file 26770214]

## Sheet: Sheet1
	Table S1. Summary of rDNA and CUP1 instability measurements.
	Parameter measured	Assay	Estimate (units)	Reference(s)
	Mitotic sister-chromatid recombination at the rDNA	Traditional marker loss assay	0.0012 (/cell/cell division)	Casper et al., 2008; Gottlieb et al., 1989
	Average loss rate of tagged rDNA unit	Colony PCR for tag	0.0032 (/repeat/cell division)	Ganley et al., 2011
	Average rDNA repeat loss rate	qRIN	0.0003-0.001 (/repeat/cell division)	This study
	Mitotic sister-chromatid recombination at the CUP1 array	Traditional marker loss assay	0.00015 (/cell/cell division)	Zhao et al., 2017
	CUP1 copy number variation	Gel electrophoresis and Southern blotting	0.00034 (/cell/cell division)	Andersen et al., 2015
	Average CUP1 repeat loss rate (transcription-independent)	qRIN	1×10-6 (2×CUP1) – 5×10-5 (17×CUP1) (/repeat/cell division)	This study
	Base substitutional mutation rate (yeast)	Whole genome sequencing	0.33×10-9 (/site/cell division)	Lynch et al., 2008
